# Supplementary material for: Designing a flower-shaped ZnS/CoS heterojunction for efficient electroreduction of N2 to NH3
Source: Royal Society of Chemistry journal article supplement (doi:10.1039/d4cc02860k), 2024-01-01
Supplement: d4cc02860k1.pdf [file d4cc02860k1.pdf]

## Supporting information

### Architecting Flower-like ZnS/CoS Heterojunction for Efficient N<sub>2</sub>

#### Electroreduction to NH<sub>3</sub>

Ze Gao<sup>a, b</sup>, Ming Xu<sup>b</sup>, Renming Liu<sup>a</sup>, Hang Xu<sup>b</sup>, DongXue Chu<sup>b</sup>, Daming Yang<sup>b</sup>, Ming Feng<sup>\*b</sup>, Ting Wang<sup>\*b</sup>, Guangyong Jin<sup>\*a</sup>

<sup>a</sup>Jilin Key Laboratory of Solid-State Laser Technology and Application, School of Physics, Changchun University of Science and Technology, Changchun 130022, People's Republic of China.

<sup>b</sup>Key Laboratory of Functional Materials Physics and Chemistry of the Ministry of Education, Jilin Normal University, Changchun 130103, People's Republic of China.

\*Corresponding author.

Email: [mingfeng@jlnu.edu.cn](mailto:mingfeng@jlnu.edu.cn) (Ming Feng), [wangt@jlnu.edu.cn](mailto:wangt@jlnu.edu.cn) (Ting Wang), [jgycust@163.com](mailto:jgycust@163.com) (Guangyong Jin)

## **Experimental section**

### **1.1 Materials**

Zinc acetate ( $(\text{CH}_3\text{COO})_2\text{Zn}$ , 99%), cobalt chloride hexahydrate ( $\text{CoCl}\cdot 6\text{H}_2\text{O}$ , 98%), thiourea ( $\text{CH}_4\text{N}_2\text{S}$ , 99%); ethanol ( $\text{C}_2\text{H}_5\text{OH}$ , >99.5%), sodium hydroxide ( $\text{NaOH}$ , 96%), sodium nitroprusside ( $\text{Na}_2[\text{Fe}(\text{NO})(\text{CN})_5]\cdot 2\text{H}_2\text{O}$ , 99%), ammonium chloride ( $\text{NH}_4\text{Cl}$ , 99.99%), sodium hypochlorite solution ( $\text{NaClO}$ , 6-14%), salicylic acid ( $\text{C}_7\text{H}_6\text{O}_3$ , 99.5%), Nafion solution (5 wt.%), and sodium citrate ( $\text{C}_6\text{H}_5\text{Na}_3\text{O}_7$ , 98%) were purchased from Aladdin.

### **1.2 Synthesis of CoS electrocatalysts**

The CoS electrocatalysts were prepared by the hydrothermal reaction. Firstly, 1.6 mmol of  $\text{CoCl}\cdot 6\text{H}_2\text{O}$  was added to 40 mL of deionized water and stirred until completely dissolved. Then, 1 mmol of  $\text{CH}_4\text{N}_2\text{S}$  was added to the solution and stirred for 60 min. After that, the mixture was transferred to a 50 mL Teflon-lined autoclave and maintained at 180 °C for 10 h in an oven. Finally, the Teflon-lined autoclave was allowed to cool to room temperature. The CoS electrocatalysts were collected, washed with deionized water, and dried at 60 °C overnight.

### **1.3 Synthesis of ZnS/CoS heterostructure**

The ZnS/CoS-101 catalyst was synthesized by hydrothermal synthesis method. Specifically, 200 mg of CoS was added to 40 mL of deionized water and sonicated for 40 min to obtain a dispersion. Then added 482 mg of  $(\text{CH}_3\text{COO})_2\text{Zn}$  and 167 mg of  $\text{CH}_4\text{N}_2\text{S}$  to the dispersion liquid, stirred until completely dissolved. Afterward, the mixture was transferred into a hydrothermal synthesis reactor (50 mL) and heated in an electric oven at 160 °C for 12 hours. Following cooling to room temperature, the resulting solid was washed twice with deionized water and ethanol. Finally, the material was dried at 60 °C for 12 h. In a similar manner, we prepared a series of catalyst materials by adjusting the molar ratio of Zn and Co (Zn:Co=1:3, 1:5, 1:10), resulting in materials labeled ZnS/CoS-103, ZnS/CoS-105 and ZnS/CoS-110, respectively.

### **1.4 Electrochemical measurements**

The electrochemical measurements were performed using a standard three-electrode

system in a 0.1 M Na<sub>2</sub>SO<sub>4</sub> electrolyte solution under ambient temperature and pressure conditions via the CHI-660E electrochemical workstation. The catalysts loaded carbon paper (CP) was used as the working electrode, and a graphite rod and saturated Ag/AgCl electrode were served as counter and reference electrodes, respectively. The working electrode (1×1 cm<sup>2</sup>) was fabricated using catalyst ink and air-dried at ambient temperature. The catalyst ink was prepared by sonication, where 5 mg of catalyst was dispersed in 920 μL of ethanol containing 80 μL of Nafion (5 wt%). Subsequently, a volume of 20 μL of the catalyst ink was applied to the CP and dried at room temperature. The NRR tests were conducted using an H-type dual chamber electrochemical cell, which was separated by a Nafion 115 membrane. Before conducting the tests, the Nafion membrane underwent pretreatment involving heating in a 5% H<sub>2</sub>O<sub>2</sub> solution for 1 h, followed by immersion in a 0.5 M H<sub>2</sub>SO<sub>4</sub> solution for another hour, and finally rinsing with deionized water for 1 h. The potentials were all converted to reversible hydrogen electrodes (RHE), where  $E (V \text{ vs. RHE}) = E (V \text{ vs. Ag/AgCl}) + 0.197 + 0.059 \times \text{pH}$ . Before the NRR test, the electrolyte was purged with N<sub>2</sub> for a duration of 30 min.

### 1.5 Determination of NH<sub>3</sub>

The ammonia concentration in the electrolyte was determined by the indophenol blue method. 4 mL of electrolyte removed from the electrochemical reaction vessel and added 0.2 mL of the catalyst solution (1 wt.% Na<sub>2</sub>[Fe(NO)(CN)<sub>5</sub>]·2H<sub>2</sub>O), 1 mL of the oxidizing solution (0.05 M NaClO), and 2 mL of colouring solution (1.0 M NaOH solution with 5 wt.% salicylic acid and 5 wt.% sodium citrate) into it. After standing at room temperature for 2 h, the UV-Vis absorption spectra were tested using a UV-2700 UV-Vis spectrophotometer at λ=655 nm. The concentration absorbance curves were calibrated using standard NH<sub>4</sub>Cl in 0.1 M Na<sub>2</sub>SO<sub>4</sub> solution and the obtained calibration curve ( $y = 0.382x + 0.03$ ,  $R^2 = 0.999$ ) was used to calculate the ammonia concentration.

### 1.6 Calculations of NH<sub>3</sub> yield rate and FE

NH<sub>3</sub> yield rate was calculated using the following equations:

$$\text{NH}_3 \text{ yield rate } (\mu\text{g h}^{-1} \text{ mg}_{\text{cat.}}^{-1}) = ([\text{NH}_4^+] \times V) / (t \times m_{\text{cat.}}) \quad (1)$$

FE was calculated according the following equations:

$$FE = 3 \times F \times [\text{NH}_4^+] \times V/18 \times Q \times 100\% \quad (2)$$

where  $[\text{NH}_4^+]$  ( $\mu\text{g/mL}$ ) is the concentration of the  $\text{NH}_3$  produced;  $V$  (mL) is the volume of the electrolyte solution;  $t$  (h) is the potential applied time;  $m_{\text{cat.}}$  (mg) is the mass loading of catalyst on CP;  $F$  is the Faraday constant ( $96485 \text{ C mol}^{-1}$ );  $Q$  (C) is the quantity of applied electricity during the NRR.

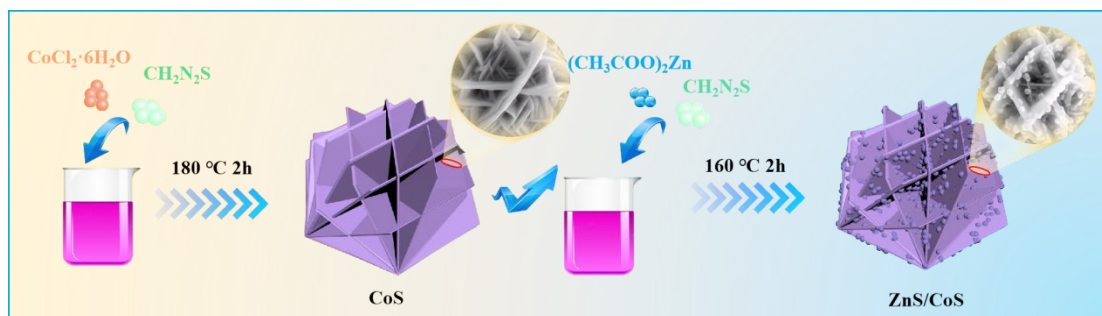

**Fig. S1** Schematic illustration of synthesis process for ZnS/CoS.

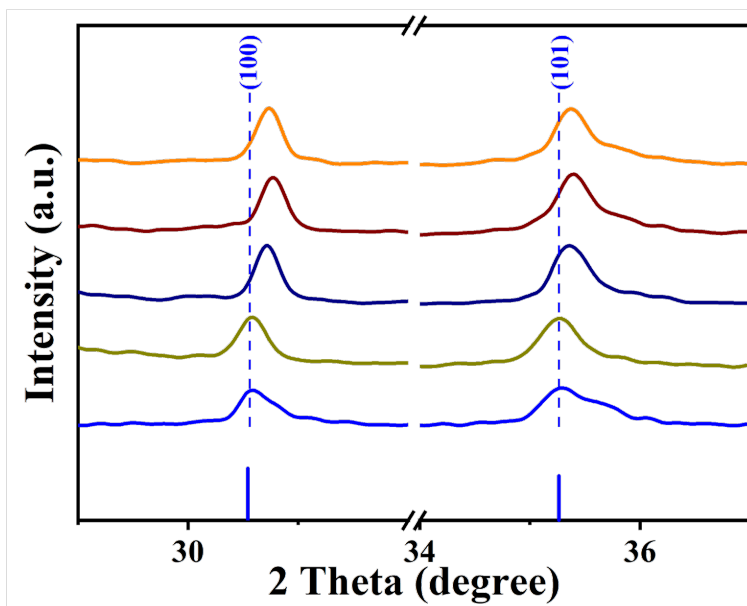

Fig. S2 a partial enlargement of the ZnS/CoS-n and CoS

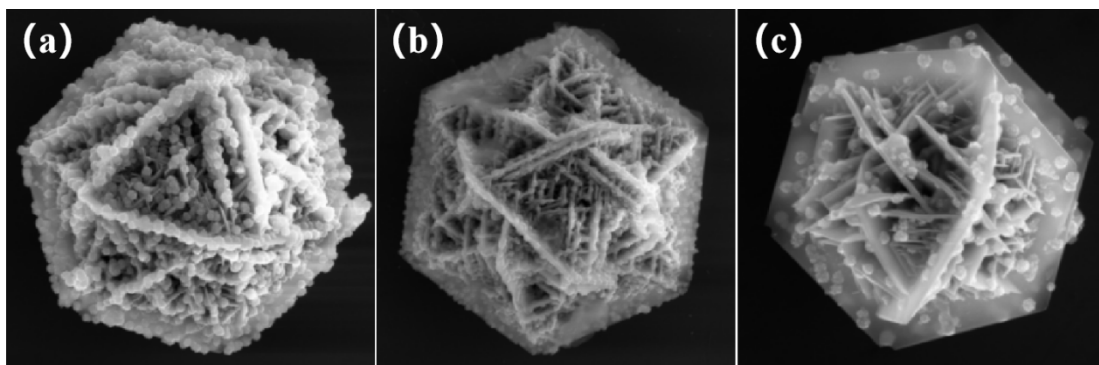

**Fig. S3** SEM images of (a) ZnS/CoS-101, (b) ZnS/CoS-103, and (c) ZnS/CoS-110.

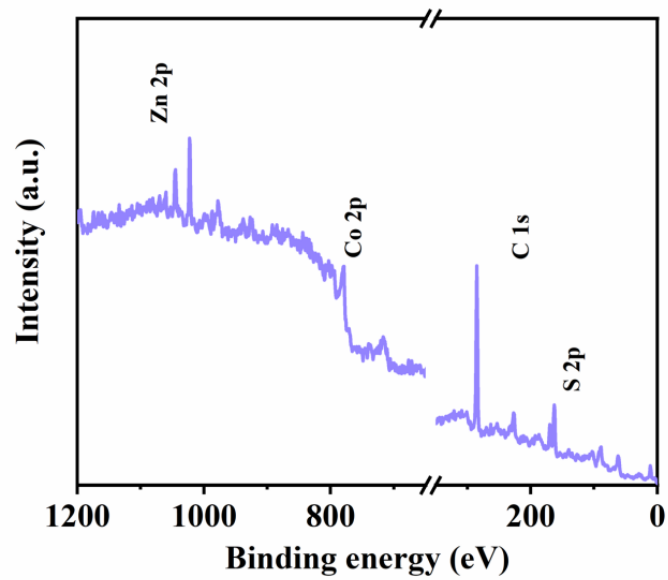

**Fig. S4** XPS diffraction patterns of the ZnS/CoS-105 heterostructure.



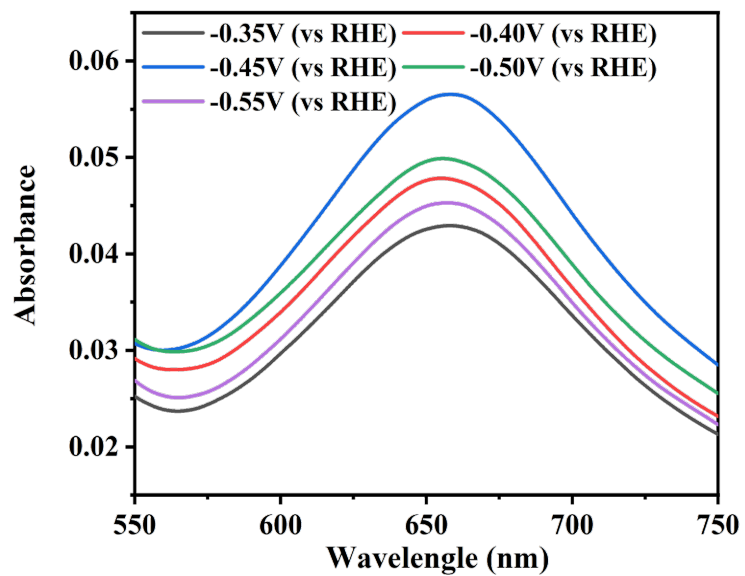

**Fig. S5.** UV-vis spectra.

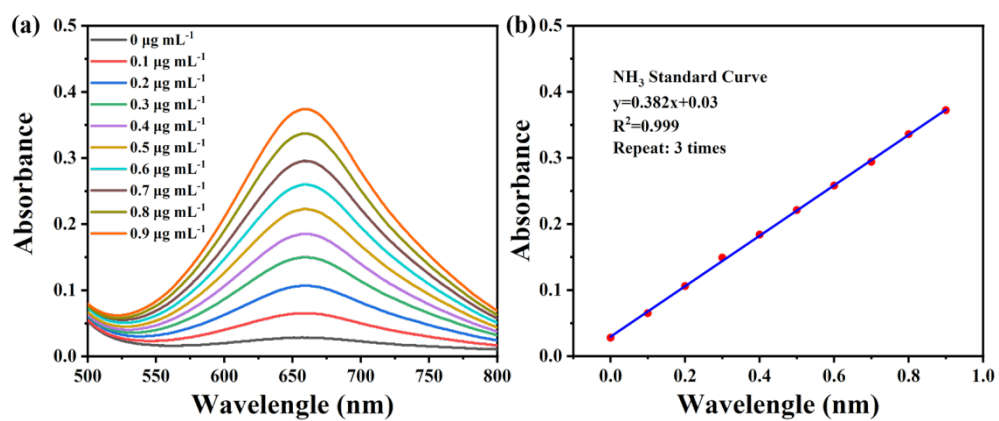

**Fig. S6** (a) UV-Vis absorption spectra of indophenol blue method with different  $\text{NH}_3$  concentrations. (b) Calibration curve used for calculation of  $\text{NH}_3$  concentrations.

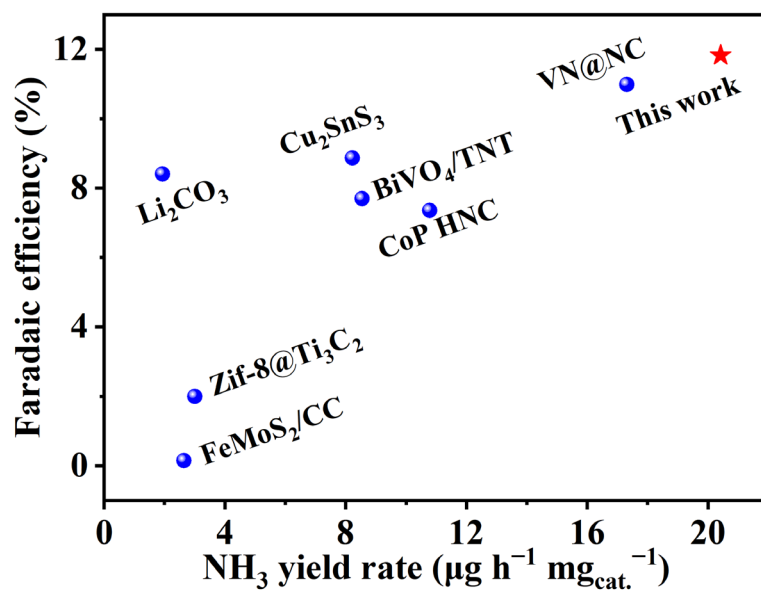

**Fig. S7** Comparison of NH<sub>3</sub> yields and FEs with reported electrocatalysts.

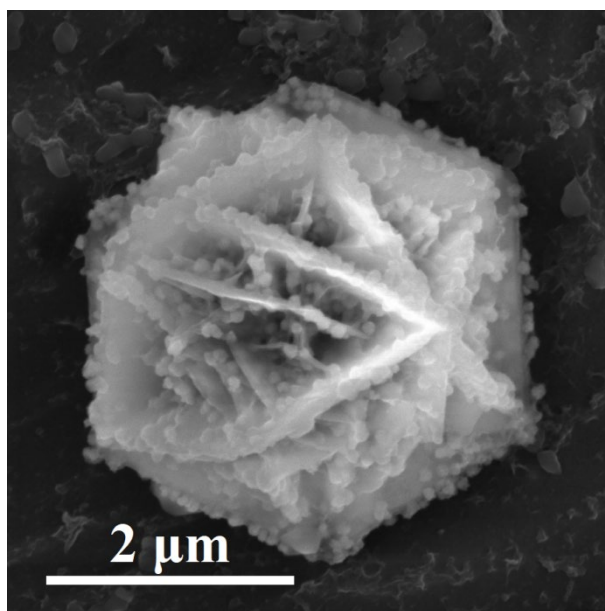

**Fig. S8** SEM image of ZnS/CoS-105 after 2 h of nitrogen reduction reaction.

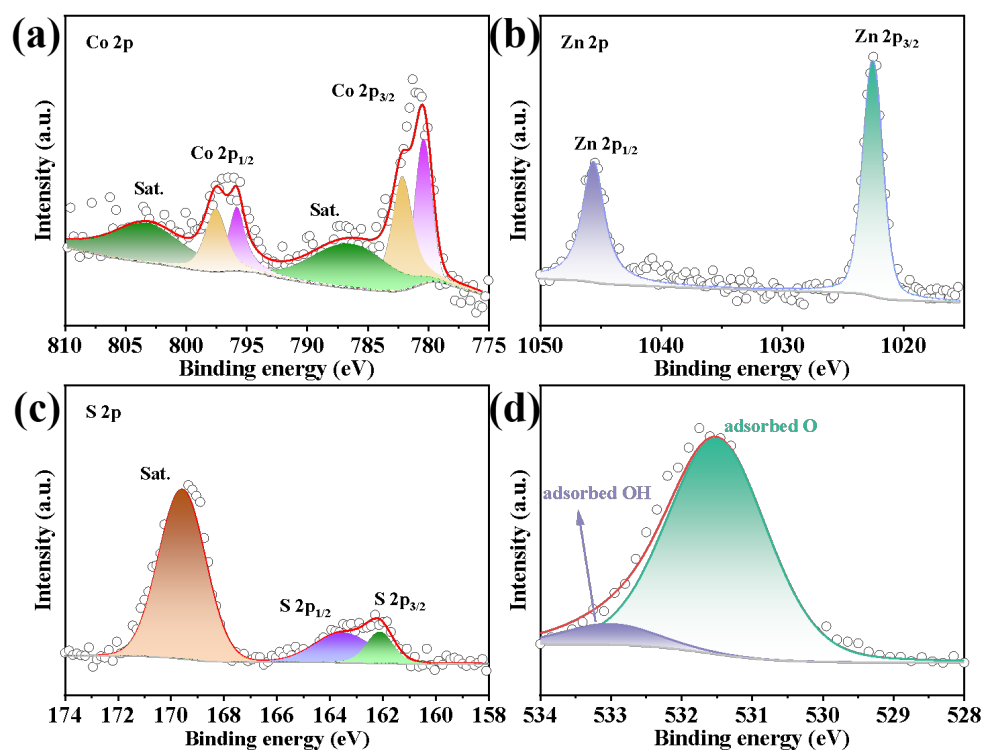

**Fig. S9** High-resolution XPS spectra of (a) Co 2p, (b) Zn 2p, (c) S 2p, and (d) O 1s of ZnS/CoS-105 after NRR.

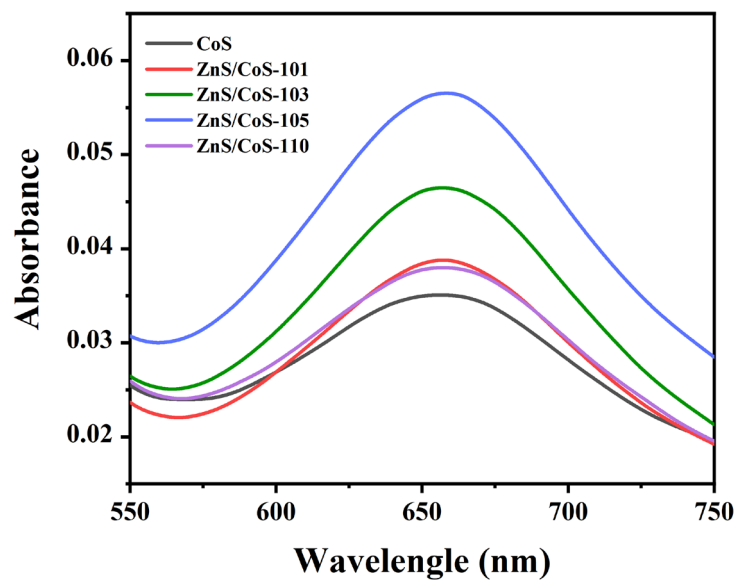

**Fig. S10** UV-vis spectra of different samples at -0.45V for 2 h.

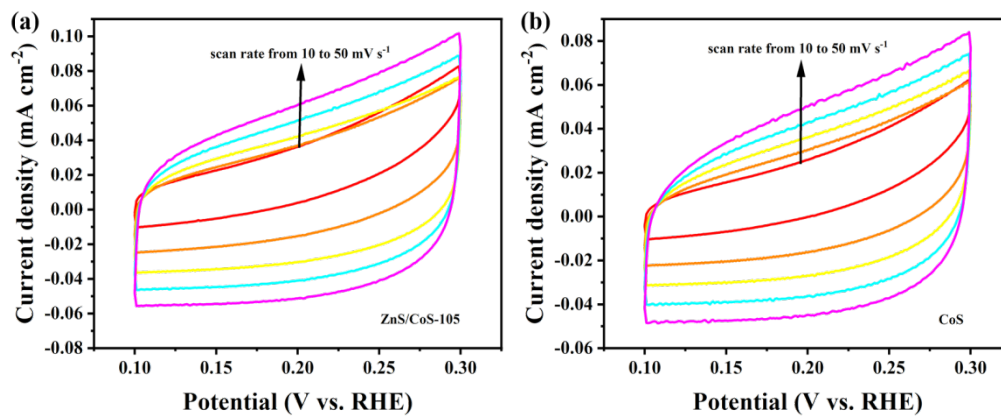

**Fig. S11** Cyclic voltammograms (CV) of (a) CoS and (b) ZnS/CoS-105 under different scan rates in 0,1M Na<sub>2</sub>SO<sub>4</sub>
